# Supplementary material for: Imaging of Peritoneal Metastases in Ovarian Cancer Using MDCT, MRI, and FDG PET/CT: A Systematic Review and Meta-Analysis
Source: MDPI journal article supplement (doi:10.3390/cancers16081467), 2024-04-11
Supplement: s1 [file s1]

**Table S1.** Results of the Per-Patient analysis for MDCT (TP: true-positive; FN: false-negative; FP: false-positive; TN: true-negative; PPV: positive-predictive value; NPV: negative-predictive value; MPR: multiplanar reformation).

| Diagnostic values of MDCT on a Per-Patient Basis                     |    |    |    |     |                 |                 |         |         |              |
|----------------------------------------------------------------------|----|----|----|-----|-----------------|-----------------|---------|---------|--------------|
| Study                                                                | TP | FN | FP | TN  | Sensitivity (%) | Specificity (%) | PPV (%) | NPV (%) | Accuracy (%) |
| <b>Pannu et al [52]</b>                                              |    |    |    |     |                 |                 |         |         |              |
| <i>axial CT + MPR-arterial phase, infracolic omentum, observer 2</i> | 7  | 0  | 0  | 10  | 100             | 100             | 100     | 100     | 100          |
| <b>Hynninen et al [63]</b>                                           |    |    |    |     |                 |                 |         |         |              |
| <i>left 'high risk upper abdomen'</i>                                | 8  | 6  | 0  | 8   | 57              | 100             | 100     | 57      | 72           |
| <b>Kim et al [64]</b>                                                |    |    |    |     |                 |                 |         |         |              |
|                                                                      | 23 | 3  | 7  | 13  | 88.5            | 65              | 76.7    | 81.3    | 78.3         |
| <b>Mazzei et al [65]</b>                                             |    |    |    |     |                 |                 |         |         |              |
|                                                                      | 38 | 0  | 3  | 2   | 100             | 40              | 93      | 100     | 93           |
| <b>Nasser et al [26]</b>                                             |    |    |    |     |                 |                 |         |         |              |
| <i>porta hepatis</i>                                                 | 4  | 3  | 1  | 147 | 57              | 99              | 80      | 98      | 97.4         |
| <b>Rodolfino et al [69]</b>                                          |    |    |    |     |                 |                 |         |         |              |
| <i>experienced readers, portal + delayed phase</i>                   | 27 | 2  | 3  | 8   | 93.1            | 72.7            | 90      | 80      | 87.5         |
| <b>Tawakol et al [70]</b>                                            |    |    |    |     |                 |                 |         |         |              |
|                                                                      | 52 | 23 | 9  | 52  | 69              | 85              | 85.2    | 69.3    | 76           |
| <b>Cerci et al [71]</b>                                              |    |    |    |     |                 |                 |         |         |              |
| <i>peritoneal carcinomatosis</i>                                     | 35 | 26 | 4  | 47  | 57.4            | 92.2            | 89.7    | 64.4    | 73.2         |
| <b>Bagul et al [72]</b>                                              |    |    |    |     |                 |                 |         |         |              |
| <i>diffuse peritoneal thickening</i>                                 | 17 | 0  | 0  | 19  | 100             | 100             | 100     | 100     | 100          |
| <b>Michielsen et al [73]</b>                                         |    |    |    |     |                 |                 |         |         |              |
| <i>duodenum, stomach, celiac trunk carcinomatosis</i>                | 11 | 5  | 1  | 77  | 68.8            | 98.7            | 91.7    | 93.9    | 93.6         |
| <b>Rajan et al [74]</b>                                              |    |    |    |     |                 |                 |         |         |              |
| <i>left upper</i>                                                    | 1  | 0  | 1  | 38  | 100             | 97.4            | 50      | 100     | 97.5         |
| <b>Alcazar et al [75]</b>                                            |    |    |    |     |                 |                 |         |         |              |
| <i>major omentum</i>                                                 | 35 | 11 | 3  | 44  | 76.1            | 93.6            | 92.1    | 80      | 85           |
| <b>An et al [27]</b>                                                 |    |    |    |     |                 |                 |         |         |              |
|                                                                      | 47 | 4  | 3  | 4   | 92.16           | 57.14           | 94      | 50      | 87.93        |
| <b>Mikkelsen et al [30]</b>                                          |    |    |    |     |                 |                 |         |         |              |
| <i>liver/duodenum/pancreas/gastric ventricle</i>                     | 3  | 4  | 0  | 43  | 43              | 100             | 100     | 92      | 92           |
| <b>Fischerova et al [78]</b>                                         |    |    |    |     |                 |                 |         |         |              |
|                                                                      | 41 | 2  | 10 | 14  | 95              | 58              | 80      | 88      | 82           |

**Table S2.** Results of the Per-Patient analysis for MRI (TP: true-positive, FN: false-negative; FP: false-positive; TN: true-negative; PPV: positive-predictive value; NPV: negative-predictive value; PMs: peritoneal metastases).

| Diagnostic values of MRI on a Per-Patient Basis                                 |    |    |    |     |                 |                 |         |         |              |
|---------------------------------------------------------------------------------|----|----|----|-----|-----------------|-----------------|---------|---------|--------------|
| Study                                                                           | TP | FN | FP | TN  | Sensitivity (%) | Specificity (%) | PPV (%) | NPV (%) | Accuracy (%) |
| Tempany et al [51]                                                              |    |    |    |     |                 |                 |         |         |              |
|                                                                                 | 39 | 2  | 27 | 107 | 95              | 80              | 59.1    | 98.2    | 83.4         |
| Ricke et al [53]                                                                |    |    |    |     |                 |                 |         |         |              |
| <i>greater omentum</i>                                                          | 8  | 13 | 2  | 34  | 38.1            | 94.4            | 80      | 72.3    | 73.7         |
| Sanli et al [61]                                                                |    |    |    |     |                 |                 |         |         |              |
| <i>PMs: 2-3 cm</i>                                                              | 15 | 1  | 0  | 31  | 93.3            | 100             | 100     | 96.9    | 97.8         |
| Espada et al [62]                                                               |    |    |    |     |                 |                 |         |         |              |
| <i>omental extension: spleen parenchyma, splenic hilum, stomach, lesser sac</i> | 11 | 0  | 0  | 23  | 100             | 100             | 100     | 100     | 100          |
| Michielsen et al [73]                                                           |    |    |    |     |                 |                 |         |         |              |
| <i>duodenum, stomach, celiac trunk</i>                                          | 15 | 1  | 1  | 77  | 93.8            | 98.7            | 93.8    | 98.7    | 97.9         |
| Mikkelsen et al [30]                                                            |    |    |    |     |                 |                 |         |         |              |
| <i>celiac trunk/superior mesenteric artery/bowel mesentery root</i>             | 6  | 8  | 0  | 33  | 40              | 100             | 100     | 79      | 83           |
| Fischerova et al [78]                                                           |    |    |    |     |                 |                 |         |         |              |
|                                                                                 | 40 | 3  | 5  | 19  | 93              | 79              | 89      | 86      | 88           |

**Table S3.** Results of the Per-Patient analysis for FDG PET/CT (TP: true-positive, FN: false-negative; FP: false-positive; TN: true-negative; PPV: positive-predictive value; NPV: negative-predictive value).

| Diagnostic values of FDG PET/CT on a Per-Patient Basis |    |    |    |    |                 |                 |         |         |              |
|--------------------------------------------------------|----|----|----|----|-----------------|-----------------|---------|---------|--------------|
| Study                                                  | TP | FN | FP | TN | Sensitivity (%) | Specificity (%) | PPV (%) | NPV (%) | Accuracy (%) |
| Pannu et al [54]                                       |    |    |    |    |                 |                 |         |         |              |
|                                                        | 8  | 3  | 3  | 2  | 72.7            | 40              | 72.7    | 40      | 62.5         |
| Sanli et al [61]                                       |    |    |    |    |                 |                 |         |         |              |
| <i>PMs: 2-3 cm</i>                                     | 15 | 0  | 0  | 32 | 100             | 100             | 100     | 100     | 100          |
| Hynninen et al [63]                                    |    |    |    |    |                 |                 |         |         |              |
| <i>omentum</i>                                         | 31 | 3  | 1  | 6  | 91              | 86              | 97      | 67      | 90           |
| Kim et al [64]                                         |    |    |    |    |                 |                 |         |         |              |
|                                                        | 25 | 1  | 2  | 18 | 96.2            | 90              | 92.6    | 94.7    | 93.5         |
| Tawakol et al [70]                                     |    |    |    |    |                 |                 |         |         |              |
|                                                        | 72 | 3  | 0  | 61 | 96              | 100             | 100     | 95.3    | 98           |
| Tsoi et al [77]                                        |    |    |    |    |                 |                 |         |         |              |
|                                                        | 25 | 2  | 4  | 18 | 92.6            | 81.8            | 86.2    | 90      | 87.8         |
| Mikkelsen et al [30]                                   |    |    |    |    |                 |                 |         |         |              |
| <i>liver/duodenum/pancreas/gastric ventricle</i>       | 6  | 1  | 1  | 42 | 85              | 98              | 86      | 98      | 96           |

| Mallet et al [44] |    |   |   |   |      |      |    |      |      |
|-------------------|----|---|---|---|------|------|----|------|------|
| AR-0 (central)    | 69 | 4 | 6 | 5 | 94.5 | 45.5 | 92 | 55.5 | 88.1 |

**Table S4.** Results of the Per-Region analysis for MDCT (TP: true-positive, FN: false-negative; FP: false-positive; TN: true-negative; PPV: positive-predictive value; NPV: negative-predictive value).

| Diagnostic values of MDCT on a Per-Region Basis    |     |     |     |      |                 |                 |         |         |              |
|----------------------------------------------------|-----|-----|-----|------|-----------------|-----------------|---------|---------|--------------|
| Study                                              | TP  | FN  | FP  | TN   | Sensitivity (%) | Specificity (%) | PPV (%) | NPV (%) | Accuracy (%) |
| Kitajima et al [56]                                |     |     |     |      |                 |                 |         |         |              |
|                                                    | 27  | 18  | 4   | 83   | 60              | 95.4            | 87.1    | 82.2    | 83.3         |
| Kitajima et al [57]                                |     |     |     |      |                 |                 |         |         |              |
| <i>liver surface</i>                               | 2   | 0   | 0   | 38   | 100             | 100             | 100     | 100     | 100          |
| Choi et al [58]                                    |     |     |     |      |                 |                 |         |         |              |
|                                                    | 114 | 137 | 135 | 355  | 45              | 72              | 46      | 72      | 63.3         |
| Metser et al [59]                                  |     |     |     |      |                 |                 |         |         |              |
|                                                    | 336 | 78  | 27  | 1404 | 81.2            | 98.1            | 92.6    | 94.7    | 94.3         |
| Hynninen et al [63]                                |     |     |     |      |                 |                 |         |         |              |
|                                                    | 196 | 288 | 20  | 216  | 41              | 92              | 90.7    | 42.8    | 57           |
| Mazzei et al [65]                                  |     |     |     |      |                 |                 |         |         |              |
|                                                    | 141 | 54  | 73  | 291  | 72              | 80              | 66      | 84      | 77           |
| Michielsen et al [66]                              |     |     |     |      |                 |                 |         |         |              |
|                                                    | 136 | 72  | 47  | 220  | 65              | 82              | 74      | 75      | 75           |
| Schmidt et al [67]                                 |     |     |     |      |                 |                 |         |         |              |
|                                                    | 71  | 3   | 5   | 56   | 96              | 92              | 95      | 94      | 95           |
| Lopez-Lopez et al [68]                             |     |     |     |      |                 |                 |         |         |              |
|                                                    | 79  | 199 | 9   | 480  | 35              | 98              | 90      | 72      | 73           |
| Rodolfino et al [69]                               |     |     |     |      |                 |                 |         |         |              |
| <i>experienced readers, portal + delayed phase</i> | 171 | 11  | 21  | 304  | 94              | 93.5            | 89.1    | 96.5    | 93.7         |
| Abdalla Ahmed et al [76]                           |     |     |     |      |                 |                 |         |         |              |
|                                                    | 925 | 50  | 20  | 130  | 94.9            | 86.7            | 97.9    | 72.2    | 93.8         |
| An et al [27]                                      |     |     |     |      |                 |                 |         |         |              |
|                                                    | 184 | 108 | 39  | 108  | 63.01           | 73.47           | 82.51   | 50      | 66.51        |

**Table S5.** Results of the Per-Region analysis for MRI (TP: true-positive, FN: false-negative; FP: false-positive; TN: true-negative; PPV: positive-predictive value; NPV: negative-predictive value).

| Diagnostic values of MRI on a Per-Region Basis |     |    |    |     |                 |                 |         |         |              |
|------------------------------------------------|-----|----|----|-----|-----------------|-----------------|---------|---------|--------------|
| Study                                          | TP  | FN | FP | TN  | Sensitivity (%) | Specificity (%) | PPV (%) | NPV (%) | Accuracy (%) |
| Kim et al [55]                                 |     |    |    |     |                 |                 |         |         |              |
|                                                | 12  | 2  | 0  | 22  | 86              | 100             | 100     | 92      | 94           |
| Michielsen et al [66]                          |     |    |    |     |                 |                 |         |         |              |
|                                                | 189 | 19 | 24 | 243 | 91              | 91              | 89      | 93      | 91           |
| Schmidt et al [67]                             |     |    |    |     |                 |                 |         |         |              |
|                                                | 73  | 1  | 10 | 51  | 98              | 84              | 91      | 96      | 93           |

**Table S6.** Results of the Per-Region analysis for FDG PET/CT (TP: true-positive; FN: false-negative; FP: false-positive; TN: true-negative; PPV: positive-predictive value; NPV: negative-predictive value).

| Diagnostic values of FDG PET/CT on a Per-Region Basis |     |     |    |     |                 |                 |         |         |              |
|-------------------------------------------------------|-----|-----|----|-----|-----------------|-----------------|---------|---------|--------------|
| Study                                                 | TP  | FN  | FP | TN  | Sensitivity (%) | Specificity (%) | PPV (%) | NPV (%) | Accuracy (%) |
| <b>Pannu et al [54]</b>                               |     |     |    |     |                 |                 |         |         |              |
|                                                       | 7   | 24  | 3  | 16  | 22.5            | 84.2            | 70      | 40      | 46           |
| <b>Kim et al [55]</b>                                 |     |     |    |     |                 |                 |         |         |              |
|                                                       | 6   | 8   | 1  | 21  | 43              | 96              | 86      | 72      | 75           |
| <b>Kitajima et al [56]</b>                            |     |     |    |     |                 |                 |         |         |              |
| CECT                                                  | 36  | 9   | 2  | 85  | 80              | 97.7            | 94.7    | 90.4    | 91.7         |
| <b>Kitajima et al [57]</b>                            |     |     |    |     |                 |                 |         |         |              |
| <i>liver surface</i>                                  | 2   | 0   | 0  | 38  | 100             | 100             | 100     | 100     | 100          |
| <b>De Iaco et al [60]</b>                             |     |     |    |     |                 |                 |         |         |              |
|                                                       | 243 | 65  | 12 | 26  | 78.9            | 68.4            | 95.3    | 28.5    | 77.7         |
| <b>Hynninen et al [63]</b>                            |     |     |    |     |                 |                 |         |         |              |
|                                                       | 237 | 226 | 25 | 205 | 51              | 89              | 90.4    | 47.5    | 64           |
| <b>Michielsen et al [66]</b>                          |     |     |    |     |                 |                 |         |         |              |
|                                                       | 108 | 100 | 39 | 228 | 52              | 85              | 73      | 70      | 71           |
| <b>Schmidt et al [67]</b>                             |     |     |    |     |                 |                 |         |         |              |
|                                                       | 70  | 4   | 2  | 59  | 95              | 96              | 98      | 92      | 96           |
| <b>Lopez-Lopez et al [68]</b>                         |     |     |    |     |                 |                 |         |         |              |
|                                                       | 69  | 209 | 34 | 455 | 24              | 93              | 66      | 68      | 68           |
| <b>Tsoi et al [77]</b>                                |     |     |    |     |                 |                 |         |         |              |
|                                                       | 44  | 14  | 4  | 673 | 75.9            | 99.4            | 91.7    | 98      | 97.6         |
| <b>Feng et al [42]</b>                                |     |     |    |     |                 |                 |         |         |              |
|                                                       | 208 | 78  | 41 | 231 | 72.7            | 84.9            | 83.5    | 74.8    | 78.5         |

**Table S7.** Results of the Per-Patient analysis for MDCT in different abdominopelvic regions (TP: true-positive; FN: false-negative; FP: false-positive; TN: true-negative; PPV: positive-predictive value; NPV: negative-predictive value; ARs: abdominopelvic regions; MPR: multiplanar reformation).

| Diagnostic values of MDCT on a Per-Patient Basis in different ARs                                            |    |    |    |    |                 |                 |         |         |              |
|--------------------------------------------------------------------------------------------------------------|----|----|----|----|-----------------|-----------------|---------|---------|--------------|
| Study                                                                                                        | TP | FN | FP | TN | Sensitivity (%) | Specificity (%) | PPV (%) | NPV (%) | Accuracy (%) |
| <b>AR0</b>                                                                                                   |    |    |    |    |                 |                 |         |         |              |
| <b>Pannu et al [52]</b><br><i>axial CT + MPR-<br/>arterial phase,<br/>infracolic omentum,<br/>observer 2</i> | 7  | 0  | 0  | 10 | 100             | 100             | 100     | 100     | 100          |
| <b>Hynninen et al [63]</b><br><i>omentum</i>                                                                 | 27 | 7  | 2  | 5  | 79              | 71              | 93      | 42      | 78           |
| <b>Cerci et al [71]</b><br><i>omentum</i>                                                                    | 36 | 17 | 3  | 55 | 67.9            | 94.8            | 92.3    | 76.4    | 82           |
| <b>Bagul et al [72]</b><br><i>omentum</i>                                                                    | 34 | 1  | 0  | 1  | 97.1            | 100             | 100     | 50      | 97.2         |
| <b>Rajan et al [74]</b>                                                                                      | 14 | 10 | 2  | 14 | 58.3            | 87.5            | 87.5    | 58.3    | 70           |

|                                                                                                                         |    |    |   |     |      |      |      |      |      |
|-------------------------------------------------------------------------------------------------------------------------|----|----|---|-----|------|------|------|------|------|
| <i>central</i>                                                                                                          |    |    |   |     |      |      |      |      |      |
| <b>Alcazar et al [75]</b><br><i>major omentum</i>                                                                       | 35 | 11 | 3 | 44  | 76.1 | 93.6 | 92.1 | 80   | 85   |
| <b>Fischerova et al [78]</b><br><i>greater omentum</i>                                                                  | 40 | 2  | 9 | 16  | 95   | 64   | 82   | 89   | 84   |
| <b>AR1</b>                                                                                                              |    |    |   |     |      |      |      |      |      |
| <b>Pannu et al [52]</b><br><i>axial CT + MPR-<br/>arterial phase,<br/>porta<br/>hepatis/gallbladder,<br/>observer 2</i> | 2  | 2  | 0 | 13  | 50   | 100  | 100  | 86.6 | 88.2 |
| <b>Hynninen et al [63]</b><br><i>right 'high risk<br/>upper abdomen'</i>                                                | 17 | 14 | 0 | 5   | 55   | 100  | 100  | 26   | 61   |
| <b>Nasser et al [26]</b><br><i>porta hepatis</i>                                                                        | 4  | 3  | 1 | 147 | 57   | 99   | 80   | 98   | 97.4 |
| <b>Bagul et al [72]</b><br><i>right subdiaphragm</i>                                                                    | 32 | 3  | 0 | 1   | 91.4 | 100  | 100  | 25   | 91.6 |
| <b>Rajan et al [74]</b><br><i>right upper</i>                                                                           | 1  | 3  | 5 | 31  | 25   | 86.1 | 16.6 | 91.1 | 80   |
| <b>Alcazar et al [75]</b><br><i>hepatic hilum</i>                                                                       | 2  | 8  | 0 | 83  | 20   | 100  | 100  | 91.2 | 91.4 |
| <b>Mikkelsen et al [30]</b><br><i>porta hepatis/<br/>hepatoduodenal<br/>ligament</i>                                    | 6  | 11 | 1 | 32  | 35   | 97   | 86   | 74   | 76   |
| <b>Fischerova et al [78]</b><br><i>right diaphragm</i>                                                                  | 26 | 10 | 3 | 28  | 72   | 90   | 90   | 74   | 81   |
| <b>AR2</b>                                                                                                              |    |    |   |     |      |      |      |      |      |
| <b>Pannu et al [52]</b><br><i>axial CT + MPR-<br/>arterial phase,<br/>lesser sac,<br/>observer 2</i>                    | 2  | 1  | 3 | 11  | 66.6 | 78.5 | 40   | 91.6 | 76.4 |
| <b>Bagul et al [72]</b><br><i>lesser sac</i>                                                                            | 8  | 7  | 0 | 21  | 53.3 | 100  | 100  | 75   | 80.5 |
| <b>Rajan et al [74]</b><br><i>epigastrium</i>                                                                           | 3  | 3  | 3 | 31  | 50   | 91.1 | 50   | 91.1 | 85   |
| <b>Fischerova et al [78]</b><br><i>lesser omentum</i>                                                                   | 4  | 4  | 3 | 53  | 50   | 95   | 57   | 93   | 89   |
| <b>AR3</b>                                                                                                              |    |    |   |     |      |      |      |      |      |
| <b>Pannu et al [52]</b>                                                                                                 | 2  | 0  | 1 | 14  | 100  | 93.3 | 66.6 | 100  | 94.1 |

|                                                                                              |    |    |   |     |      |      |      |      |      |
|----------------------------------------------------------------------------------------------|----|----|---|-----|------|------|------|------|------|
| <i>axial CT + MPR-<br/>arterial phase,<br/>spleen,<br/>observer 2</i>                        |    |    |   |     |      |      |      |      |      |
| <b>Hynninen et al<br/>[63]</b><br><i>left 'high risk upper<br/>abdomen'</i>                  | 8  | 6  | 0 | 8   | 57   | 100  | 100  | 57   | 72   |
| <b>Nasser et al [26]</b><br><i>spleen</i>                                                    | 5  | 14 | 2 | 134 | 26   | 99   | 71   | 91   | 90   |
| <b>Bagul et al [72]</b><br><i>left subdiaphragm</i>                                          | 22 | 5  | 0 | 9   | 81.4 | 100  | 100  | 35.7 | 81.6 |
| <b>Rajan et al [74]</b><br><i>left upper</i>                                                 | 1  | 0  | 1 | 38  | 100  | 97.4 | 50   | 100  | 97.5 |
| <b>Alcazar et al [75]</b><br><i>spleen</i>                                                   | 2  | 3  | 0 | 88  | 40   | 100  | 100  | 96.7 | 97   |
| <b>Fischerova et al<br/>[78]</b><br><i>left diaphragm</i>                                    | 15 | 6  | 3 | 42  | 71   | 93   | 83   | 88   | 86   |
| <b>AR4</b>                                                                                   |    |    |   |     |      |      |      |      |      |
| <b>Bagul et al [72]</b><br><i>left paracolic region</i>                                      | 19 | 8  | 0 | 9   | 70.3 | 100  | 100  | 53.7 | 77.7 |
| <b>Rajan et al [74]</b><br><i>left flank</i>                                                 | 7  | 0  | 3 | 30  | 100  | 90.9 | 70   | 100  | 92.5 |
| <b>Fischerova et al<br/>[78]</b><br><i>left paracolic gutter</i>                             | 20 | 9  | 8 | 30  | 69   | 79   | 71   | 77   | 75   |
| <b>AR5-7</b>                                                                                 |    |    |   |     |      |      |      |      |      |
| <b>Pannu et al [52]</b><br><i>axial CT + MPR-<br/>arterial phase, pelvis,<br/>observer 1</i> | 8  | 4  | 0 | 5   | 66.6 | 100  | 100  | 55.5 | 76.4 |
| <b>Hynninen et al<br/>[63]</b><br><i>sigmoid serosa</i>                                      | 5  | 20 | 0 | 9   | 20   | 100  | 100  | 31   | 41   |
| <b>Nasser et al [26]</b><br><i>rectum</i>                                                    | 15 | 24 | 1 | 115 | 39   | 99   | 94   | 83   | 84   |
| <b>Cerci et al [71]</b><br><i>perivesical-perirectal<br/>fat</i>                             | 23 | 31 | 2 | 53  | 42.6 | 96.4 | 92   | 63.1 | 62.7 |
| <b>Bagul et al [72]</b><br><i>uterus and ovary</i>                                           | 34 | 0  | 0 | 2   | 100  | 100  | 100  | 100  | 100  |
| <b>Rajan et al [74]</b><br><i>pelvis</i>                                                     | 34 | 2  | 1 | 3   | 94.4 | 75   | 97.1 | 60   | 92.5 |
| <b>Alcazar et al [75]</b><br><i>pelvic peritoneum</i>                                        | 35 | 24 | 3 | 31  | 59.3 | 91.2 | 92.1 | 56.4 | 71   |
| <b>Fischerova et al<br/>[78] pelvis</b>                                                      | 42 | 5  | 5 | 14  | 89   | 74   | 89   | 74   | 85   |
| <b>AR6</b>                                                                                   |    |    |   |     |      |      |      |      |      |
| <b>Pannu et al [52]</b>                                                                      | 4  | 1  | 0 | 12  | 80   | 100  | 100  | 92.3 | 94.1 |

|                                                                                      |    |    |   |     |      |      |      |      |      |
|--------------------------------------------------------------------------------------|----|----|---|-----|------|------|------|------|------|
| <i>axial CT + MPR-<br/>arterial phase,<br/>ovarian mass,<br/>observer 2</i>          |    |    |   |     |      |      |      |      |      |
| <b>Nasser et al [26]</b><br><i>rectum</i>                                            | 15 | 24 | 1 | 115 | 39   | 99   | 94   | 83   | 84   |
| <b>Cerci et al [71]</b><br><i>perivesical-perirectal<br/>fat</i>                     | 23 | 31 | 2 | 53  | 42.6 | 96.4 | 92   | 63.1 | 62.7 |
| <b>Bagul et al [72]</b><br><i>uterus and ovary</i>                                   | 34 | 0  | 0 | 2   | 100  | 100  | 100  | 100  | 100  |
| <b>Rajan et al [74]</b><br><i>pelvis</i>                                             | 34 | 2  | 1 | 3   | 94.4 | 75   | 97.1 | 60   | 92.5 |
| <b>Alcazar et al [75]</b><br><i>rectosigmoid</i>                                     | 9  | 18 | 7 | 59  | 33.3 | 89.4 | 56.2 | 76.6 | 73   |
| <b>Fischerova et al<br/>[78]</b><br><i>rectosigmoid</i>                              | 34 | 2  | 8 | 21  | 94   | 72   | 81   | 91   | 85   |
| <b>AR8</b>                                                                           |    |    |   |     |      |      |      |      |      |
| <b>Bagul et al [72]</b><br><i>right paracolic<br/>region</i>                         | 22 | 11 | 0 | 3   | 68.5 | 100  | 100  | 23   | 71.4 |
| <b>Rajan et al [74]</b><br><i>right flank</i>                                        | 7  | 1  | 1 | 31  | 87.5 | 96.8 | 87.5 | 96.8 | 95   |
| <b>Fischerova et al<br/>[78]</b><br><i>right paracolic gutter</i>                    | 20 | 8  | 8 | 31  | 71   | 79   | 71   | 79   | 76   |
| <b>diaphragm</b>                                                                     |    |    |   |     |      |      |      |      |      |
| <b>Pannu et al [52]</b><br><i>axial CT + MPR-<br/>arterial phase,<br/>observer 2</i> | 5  | 6  | 0 | 6   | 45.5 | 100  | 100  | 50   | 64.7 |
| <b>Hynninen et al<br/>[63]</b>                                                       | 16 | 18 | 0 | 6   | 47   | 100  | 100  | 25   | 55   |
| <b>Nasser et al [26]</b>                                                             | 19 | 42 | 1 | 93  | 32   | 99   | 95   | 70   | 72.3 |
| <b>Cerci et al [71]</b>                                                              | 0  | 20 | 1 | 80  | 0    | 98.8 | 0    | 80   | 79.2 |
| <b>Bagul et al [72]</b><br><i>right subdiaphragm</i>                                 | 32 | 3  | 0 | 1   | 91.4 | 100  | 100  | 25   | 91.6 |
| <b>Fischerova et al<br/>[78]</b><br><i>right, left<br/>diaphragm</i>                 | 26 | 10 | 3 | 28  | 72   | 90   | 90   | 74   | 81   |
| <b>small bowel</b>                                                                   |    |    |   |     |      |      |      |      |      |
| <b>Hynninen et al<br/>[63]</b><br><i>small bowel serosa</i>                          | 2  | 12 | 2 | 25  | 14   | 93   | 50   | 68   | 66   |
| <b>Mazzei et al [65]</b>                                                             | 7  | 5  | 4 | 27  | 58   | 87   | 64   | 84   | 79   |

|                                                                                                                    |    |    |   |     |      |      |      |      |      |
|--------------------------------------------------------------------------------------------------------------------|----|----|---|-----|------|------|------|------|------|
| <b>Nasser et al [26]</b>                                                                                           | 7  | 10 | 1 | 137 | 44   | 99   | 88   | 94   | 92.9 |
| <b>Bagul et al [72]</b><br><i>small bowel serosa</i>                                                               | 8  | 12 | 1 | 15  | 35   | 93.7 | 87.5 | 53.5 | 61.1 |
| <b>Rajan et al [74]</b><br><i>lower ileum</i>                                                                      | 3  | 2  | 0 | 35  | 60   | 100  | 100  | 94.5 | 95   |
| <b>Alcazar et al [75]</b>                                                                                          | 7  | 5  | 7 | 74  | 58.3 | 91.4 | 50   | 93.7 | 87.1 |
| <b>Fischerova et al [78]</b><br><i>small bowel serosa</i>                                                          | 11 | 8  | 4 | 42  | 58   | 91   | 73   | 84   | 82   |
| <i>colon</i>                                                                                                       |    |    |   |     |      |      |      |      |      |
| <b>Hynninen et al [63]</b><br><i>large bowel serosa</i>                                                            | 13 | 53 | 2 | 40  | 20   | 95   | 87   | 37   | 49   |
| <b>Nasser et al [26]</b><br><i>large bowel</i>                                                                     | 17 | 20 | 2 | 116 | 46   | 98   | 89   | 85   | 86   |
| <b>Bagul et al [72]</b><br><i>large bowel serosa</i>                                                               | 12 | 17 | 0 | 7   | 41.3 | 100  | 100  | 29.1 | 52.7 |
| <b>Fischerova et al [78]</b><br><i>large bowel serosa</i>                                                          | 4  | 15 | 5 | 43  | 21   | 90   | 44   | 74   | 70   |
| <i>mesentery</i>                                                                                                   |    |    |   |     |      |      |      |      |      |
| <b>Pannu et al [52]</b><br><i>axial CT + MPR-<br/>arterial phase,<br/>mesenteric root,<br/>observer 1</i>          | 1  | 2  | 0 | 14  | 33.3 | 100  | 100  | 87.5 | 88.2 |
| <b>Hynninen et al [63]</b><br><i>small bowel<br/>mesentery</i>                                                     | 7  | 19 | 0 | 13  | 27   | 100  | 100  | 41   | 51   |
| <b>Nasser et al [26]</b>                                                                                           | 12 | 28 | 1 | 114 | 31   | 99   | 92   | 81   | 81.3 |
| <b>Cerci et al [71]</b>                                                                                            | 12 | 37 | 4 | 48  | 24.5 | 92.3 | 75   | 56.5 | 59.4 |
| <b>Bagul et al [72]</b><br><i>small bowel<br/>mesentery</i>                                                        | 11 | 10 | 0 | 15  | 52.3 | 100  | 100  | 60   | 72.2 |
| <b>Michielsen et al [73]</b><br><i>superior mesenteric<br/>artery, mesenteric<br/>root</i>                         | 3  | 5  | 0 | 86  | 37.5 | 100  | 100  | 94.5 | 94.7 |
| <b>Alcazar et al [75]</b>                                                                                          | 1  | 3  | 7 | 82  | 25   | 92.1 | 14.3 | 95.3 | 89.2 |
| <b>Mikkelsen et al [30]</b><br><i>celiac<br/>trunk/superior<br/>mesenteric<br/>artery/bowel<br/>mesentery root</i> | 2  | 12 | 0 | 33  | 14   | 100  | 100  | 73   | 74.5 |



|                                                                        |    |    |   |    |    |    |    |    |    |
|------------------------------------------------------------------------|----|----|---|----|----|----|----|----|----|
| <b>Fischerova et al [78]</b><br><i>small and large bowel mesentery</i> | 17 | 13 | 2 | 35 | 57 | 95 | 89 | 73 | 78 |
|------------------------------------------------------------------------|----|----|---|----|----|----|----|----|----|

**Table S8.** Results of the Per-Patient analysis for MRI in different abdominopelvic regions (TP: true-positive, FN: false-negative; FP: false-positive; TN: true-negative; PPV: positive-predictive value; NPV: negative-predictive value).

| Diagnostic values of MRI on a Per-Patient Basis in different ARs                                   |    |    |     |     |                 |                 |         |         |              |
|----------------------------------------------------------------------------------------------------|----|----|-----|-----|-----------------|-----------------|---------|---------|--------------|
| Study                                                                                              | TP | FN | FP  | TN  | Sensitivity (%) | Specificity (%) | PPV (%) | NPV (%) | Accuracy (%) |
| <i>AR0</i>                                                                                         |    |    |     |     |                 |                 |         |         |              |
| <b>Tempany et al [51]</b><br><i>omentum</i>                                                        | 40 | 30 | 82  | 128 | 57.1            | 61              | 32.8    | 81      | 60           |
| <b>Ricke et al [53]</b><br><i>greater omentum</i>                                                  | 8  | 13 | 2   | 34  | 38.1            | 94.4            | 80      | 72.3    | 73.7         |
| <b>Fischerova et al [78]</b><br><i>greater omentum</i>                                             | 38 | 4  | 5   | 20  | 90              | 80              | 88      | 83      | 87           |
| <i>diaphragm</i>                                                                                   |    |    |     |     |                 |                 |         |         |              |
| <b>Tempany et al [51]</b><br><i>subdiaphragmatic spaces</i>                                        | 27 | 18 | 106 | 129 | 60              | 55              | 20.3    | 87.8    | 55.7         |
| <b>Ricke et al [53]</b>                                                                            | 11 | 4  | 5   | 37  | 73.3            | 88.1            | 68.8    | 90.2    | 84.2         |
| <b>Espada et al [62]</b>                                                                           | 4  | 1  | 1   | 28  | 80              | 96.6            | 80      | 96.6    | 94           |
| <b>Fischerova et al [78]</b><br><i>right, left diaphragm</i>                                       | 26 | 10 | 1   | 30  | 72              | 97              | 96      | 75      | 84           |
| <i>mesentery</i>                                                                                   |    |    |     |     |                 |                 |         |         |              |
| <b>Tempany et al [51]</b>                                                                          | 20 | 18 | 94  | 148 | 52.6            | 61.1            | 17.5    | 89.2    | 60           |
| <b>Espada et al [62]</b><br><i>small and/or large bowel mesentery</i>                              | 8  | 0  | 4   | 22  | 100             | 84.6            | 66.6    | 100     | 88.2         |
| <b>Michielsen et al [73]</b><br><i>superior mesenteric artery, mesenteric root</i>                 | 8  | 0  | 1   | 85  | 100             | 98.8            | 88.9    | 100     | 98.9         |
| <b>Mikkelsen et al [30]</b><br><i>celiac trunk/superior mesenteric artery/bowel mesentery root</i> | 6  | 8  | 0   | 33  | 40              | 100             | 100     | 79      | 83           |
| <b>Fischerova et al [78]</b><br><i>small and large bowel mesentery</i>                             | 16 | 14 | 4   | 33  | 53              | 89              | 80      | 70      | 73           |

**Table S9.** Results of the Per-Patient analysis for FDG PET/CT in different abdominopelvic regions (TP: true-positive, FN: false-negative; FP: false-positive; TN: true-negative; PPV: positive-predictive value; NPV: negative-predictive value).

| Diagnostic values of FDG PET/CT on a Per-Patient Basis in different ARs      |    |    |    |    |                 |                 |         |         |              |
|------------------------------------------------------------------------------|----|----|----|----|-----------------|-----------------|---------|---------|--------------|
| Study                                                                        | TP | FN | FP | TN | Sensitivity (%) | Specificity (%) | PPV (%) | NPV (%) | Accuracy (%) |
| <i>AR0</i>                                                                   |    |    |    |    |                 |                 |         |         |              |
| <b>Hynninen et al [63]</b><br><i>omentum</i>                                 | 31 | 3  | 1  | 6  | 91              | 86              | 97      | 67      | 90           |
| <b>Tsoi et al [77]</b><br><i>omentum</i>                                     | 5  | 1  | 2  | 41 | 83.3            | 95.3            | 71.4    | 97.6    | 93.9         |
| <b>Mallet et al [44]</b><br><i>central</i>                                   | 69 | 4  | 6  | 5  | 94.5            | 45.5            | 92      | 55.5    | 88.1         |
| <i>AR1</i>                                                                   |    |    |    |    |                 |                 |         |         |              |
| <b>Hynninen et al [63]</b><br><i>right ‘high risk upper abdomen’</i>         | 20 | 11 | 0  | 5  | 65              | 100             | 100     | 31      | 70           |
| <b>Tsoi et al [77]</b><br><i>right subhepatic space</i>                      | 2  | 0  | 0  | 47 | 100             | 100             | 100     | 100     | 100          |
| <b>Mikkelsen et al [30]</b><br><i>porta hepatis/ hepatoduodenal ligament</i> | 11 | 6  | 3  | 30 | 65              | 91              | 79      | 83      | 82           |
| <b>Mallet et al [44]</b><br><i>right upper</i>                               | 53 | 14 | 5  | 11 | 79.1            | 68.8            | 91.4    | 44      | 77.1         |
| <i>AR3</i>                                                                   |    |    |    |    |                 |                 |         |         |              |
| <b>Hynninen et al [63]</b><br><i>left ‘high risk upper abdomen’</i>          | 3  | 11 | 2  | 6  | 21              | 75              | 60      | 35      | 41           |
| <b>Tsoi et al [77]</b><br><i>gastric serosa</i>                              | 1  | 0  | 0  | 48 | 100             | 100             | 100     | 100     | 100          |
| <b>Mallet et al [44]</b> <i>left upper</i>                                   | 46 | 10 | 9  | 19 | 82.1            | 67.9            | 83.6    | 65.5    | 77.4         |
| <i>AR5-7</i>                                                                 |    |    |    |    |                 |                 |         |         |              |
| <b>Hynninen et al [63]</b> <i>sigmoid</i>                                    | 19 | 7  | 2  | 8  | 73              | 80              | 91      | 53      | 75           |
| <b>Tsoi et al [77]</b><br><i>pelvis</i>                                      | 14 | 0  | 1  | 34 | 100             | 97.1            | 93.3    | 100     | 98           |
| <b>Mallet et al [44]</b><br><i>pelvis</i>                                    | 75 | 3  | 3  | 0  | 96.2            | 0               | 96.2    | 0       | 92.6         |
| <i>mesentery</i>                                                             |    |    |    |    |                 |                 |         |         |              |
| <b>Hynninen et al [63]</b> <i>small bowel mesentery</i>                      | 16 | 9  | 1  | 12 | 64              | 92              | 94      | 57      | 74           |

|                                                                                          |   |    |   |    |    |     |     |      |      |
|------------------------------------------------------------------------------------------|---|----|---|----|----|-----|-----|------|------|
| <b>Tsoi et al [77]</b>                                                                   | 2 | 3  | 0 | 44 | 40 | 100 | 100 | 93.6 | 93.9 |
| <b>Mikkelsen et al [30] celiac trunk/superior mesenteric artery/bowel mesentery root</b> | 2 | 12 | 0 | 33 | 14 | 100 | 100 | 73   | 74.5 |

**Table S10.** Results of the Per-Region analysis for MDCT in different abdominopelvic regions (TP: true-positive, FN: false-negative; FP: false-positive; TN: true-negative; PPV: positive-predictive value; NPV: negative-predictive value; ARs: abdominopelvic regions).

| Diagnostic values of MDCT on a Per-Region Basis in different ARs |    |    |    |    |                 |                 |         |         |              |
|------------------------------------------------------------------|----|----|----|----|-----------------|-----------------|---------|---------|--------------|
| Study                                                            | TP | FN | FP | TN | Sensitivity (%) | Specificity (%) | PPV (%) | NPV (%) | Accuracy (%) |
| <i>AR0</i>                                                       |    |    |    |    |                 |                 |         |         |              |
| <b>Kitajima et al [57] omentum</b>                               | 3  | 6  | 1  | 30 | 33              | 97              | 75      | 83.3    | 83           |
| <b>Choi et al [58] omentum</b>                                   | 6  | 14 | 15 | 22 | 30              | 59              | 29      | 61      | 49.1         |
| <b>Michielsen et al [66] omentum</b>                             | 18 | 5  | 3  | 5  | 78              | 63              | 86      | 50      | 74           |
| <b>An et al [27] omentum</b>                                     | 27 | 10 | 1  | 10 | 72.97           | 90.91           | 96.43   | 50      | 77.08        |
| <i>AR5-7</i>                                                     |    |    |    |    |                 |                 |         |         |              |
| <b>Kitajima et al [57] cul de sac</b>                            | 2  | 6  | 1  | 31 | 25              | 97              | 66.6    | 83.8    | 75           |
| <b>Choi et al [58] bladder dome area</b>                         | 0  | 16 | 2  | 39 | 0               | 95              | 0       | 70      | 68.4         |
| <b>Michielsen et al [66] left pelvic</b>                         | 17 | 4  | 3  | 7  | 81              | 70              | 85      | 64      | 77           |
| <b>An et al [27] pelvic peritoneum</b>                           | 22 | 21 | 7  | 25 | 51.16           | 78.12           | 75.86   | 54.35   | 62.67        |
| <i>AR6</i>                                                       |    |    |    |    |                 |                 |         |         |              |
| <b>Kitajima et al [57] cul de sac</b>                            | 2  | 6  | 1  | 31 | 25              | 97              | 66.6    | 83.8    | 75           |
| <b>Choi et al [58] bladder dome area</b>                         | 0  | 16 | 2  | 39 | 0               | 95              | 0       | 70      | 68.4         |
| <b>Michielsen et al [66] bladder surface</b>                     | 8  | 9  | 0  | 11 | 47              | 100             | 100     | 55      | 68           |
| <i>diaphragm</i>                                                 |    |    |    |    |                 |                 |         |         |              |
| <b>Kitajima et al [57]</b>                                       | 0  | 1  | 0  | 39 | 0               | 100             | -       | 97.5    | 98           |
| <b>Choi et al [58] left subdiaphragmatic area</b>                | 16 | 18 | 2  | 21 | 47              | 91              | 89      | 54      | 65           |
| <b>Michielsen et al [66] left diaphragm</b>                      | 7  | 2  | 4  | 15 | 78              | 79              | 64      | 88      | 79           |
| <b>An et al [27]</b>                                             | 1  | 15 | 1  | 7  | 6.25            | 87.50           | 50      | 31.82   | 33.33        |

|                               |    |    |   |    |    |       |       |      |       |
|-------------------------------|----|----|---|----|----|-------|-------|------|-------|
| <i>subdiaphragmatic space</i> |    |    |   |    |    |       |       |      |       |
| <b>mesentery</b>              |    |    |   |    |    |       |       |      |       |
| <b>Kitajima et al [57]</b>    | 2  | 5  | 1 | 32 | 29 | 97    | 66.7  | 86.4 | 85    |
| <b>Choi et al [58]</b>        |    |    |   |    |    |       |       |      |       |
| <i>small bowel mesentery</i>  | 3  | 11 | 3 | 40 | 21 | 93    | 50    | 78   | 75.4  |
| <b>Michielsen et al [66]</b>  |    |    |   |    |    |       |       |      |       |
| <i>small bowel mesentery</i>  | 8  | 4  | 1 | 16 | 67 | 94    | 89    | 80   | 83    |
| <b>An et al [27]</b>          | 10 | 10 | 5 | 10 | 50 | 66.67 | 66.67 | 50   | 57.14 |

**Table S11.** Results of the Per-Region analysis for FDG PET-CT in different abdominopelvic regions (TP: true-positive; FN: false-negative; FP: false-positive; TN: true-negative; PPV: positive-predictive value; NPV: negative-predictive value; ARs: abdominopelvic regions).

| <b>Diagnostic values of FDG PET/CT on a Per-Region Basis in different ARs</b> |           |           |           |           |                        |                        |                |                |                     |
|-------------------------------------------------------------------------------|-----------|-----------|-----------|-----------|------------------------|------------------------|----------------|----------------|---------------------|
| <b>Study</b>                                                                  | <b>TP</b> | <b>FN</b> | <b>FP</b> | <b>TN</b> | <b>Sensitivity (%)</b> | <b>Specificity (%)</b> | <b>PPV (%)</b> | <b>NPV (%)</b> | <b>Accuracy (%)</b> |
| <b>AR0</b>                                                                    |           |           |           |           |                        |                        |                |                |                     |
| <b>Kitajima et al [57]</b>                                                    |           |           |           |           |                        |                        |                |                |                     |
| <i>omentum</i>                                                                | 5         | 4         | 1         | 30        | 56                     | 97                     | 83.3           | 88.2           | 88                  |
| <b>De Iaco et al [60]</b>                                                     |           |           |           |           |                        |                        |                |                |                     |
| <i>mesogastrium</i>                                                           | 35        | 2         | 2         | 1         | 94.6                   | 33.3                   | 94.6           | 33.3           | 90                  |
| <b>Michielsen et al [66]</b>                                                  |           |           |           |           |                        |                        |                |                |                     |
| <i>omentum</i>                                                                | 18        | 5         | 1         | 7         | 78                     | 88                     | 95             | 58             | 81                  |
| <b>Feng et al [42]</b>                                                        |           |           |           |           |                        |                        |                |                |                     |
| <i>central</i>                                                                | 24        | 5         | 2         | 12        | 82.8                   | 85.7                   | 92.3           | 70.6           | 83.7                |
| <b>AR1</b>                                                                    |           |           |           |           |                        |                        |                |                |                     |
| <b>Pannu et al [54]</b>                                                       |           |           |           |           |                        |                        |                |                |                     |
| <i>right upper quadrant</i>                                                   | 0         | 1         | 0         | 3         | 0                      | 100                    | -              | 75             | 75                  |
| <b>De Iaco et al [60]</b>                                                     |           |           |           |           |                        |                        |                |                |                     |
| <i>right upper</i>                                                            | 21        | 13        | 0         | 2         | 61.7                   | 100                    | 100            | 13.3           | 64                  |
| <b>Michielsen et al [66]</b>                                                  |           |           |           |           |                        |                        |                |                |                     |
| <i>subhepatic/ Morrison's space</i>                                           | 5         | 5         | 9         | 32        | 50                     | 78                     | 36             | 86             | 73                  |
| <b>Feng et al [42]</b>                                                        |           |           |           |           |                        |                        |                |                |                     |
| <i>right upper</i>                                                            | 24        | 7         | 1         | 11        | 77.4                   | 91.7                   | 96             | 61.1           | 81.4                |
| <b>AR3</b>                                                                    |           |           |           |           |                        |                        |                |                |                     |
| <b>Pannu et al [54]</b>                                                       |           |           |           |           |                        |                        |                |                |                     |
| <i>left upper quadrant</i>                                                    | 1         | 1         | 1         | 1         | 50                     | 50                     | 50             | 50             | 50                  |
| <b>De Iaco et al [60]</b>                                                     |           |           |           |           |                        |                        |                |                |                     |
| <i>left upper</i>                                                             | 18        | 10        | 1         | 6         | 64.3                   | 85.7                   | 94.7           | 37.5           | 68.6                |
| <b>Michielsen et al [66]</b>                                                  |           |           |           |           |                        |                        |                |                |                     |
| <i>splenic surface</i>                                                        | 1         | 0         | 3         | 18        | 100                    | 86                     | 25             | 100            | 86                  |
| <b>Feng et al [42]</b>                                                        |           |           |           |           |                        |                        |                |                |                     |
| <i>left upper</i>                                                             | 15        | 1         | 5         | 22        | 93.8                   | 81.5                   | 75             | 95.7           | 86                  |

| AR4                                                      |    |    |   |    |      |      |      |      |      |
|----------------------------------------------------------|----|----|---|----|------|------|------|------|------|
| <b>De laco et al [60]</b><br><i>left flank</i>           | 29 | 6  | 2 | 2  | 82.8 | 50   | 93.5 | 25   | 79.5 |
| <b>Michielsen et al [66]</b><br><i>left lateroconal</i>  | 11 | 5  | 2 | 11 | 69   | 85   | 85   | 69   | 76   |
| <b>Feng et al [42]</b><br><i>left flank</i>              | 13 | 6  | 4 | 20 | 68.4 | 83.3 | 76.5 | 76.9 | 76.7 |
| AR5-7                                                    |    |    |   |    |      |      |      |      |      |
| <b>Pannu et al [54]</b>                                  | 4  | 13 | 0 | 4  | 23.5 | 100  | 100  | 23.5 | 38.1 |
| <b>Kitajima et al [57]</b><br><i>cul de sac</i>          | 4  | 4  | 1 | 31 | 50   | 97   | 80   | 88.6 | 80   |
| <b>De laco et al [60]</b><br><i>left lower</i>           | 26 | 10 | 2 | 2  | 72.2 | 50   | 92.8 | 16.6 | 70   |
| <b>Michielsen et al [66]</b><br><i>Douglas pouch</i>     | 9  | 10 | 0 | 10 | 47   | 100  | 100  | 50   | 66   |
| <b>Feng et al [42]</b><br><i>left lower</i>              | 21 | 11 | 2 | 9  | 65.6 | 81.8 | 91.3 | 45   | 69.8 |
| AR8                                                      |    |    |   |    |      |      |      |      |      |
| <b>De laco et al [60]</b><br><i>right flank</i>          | 29 | 5  | 1 | 4  | 85.3 | 80   | 96.6 | 44.4 | 84.6 |
| <b>Michielsen et al [66]</b><br><i>right lateroconal</i> | 11 | 4  | 3 | 10 | 73   | 77   | 79   | 71   | 75   |
| <b>Feng et al [42]</b><br><i>right flank</i>             | 14 | 7  | 3 | 19 | 66.7 | 86.4 | 82.4 | 73.1 | 76.7 |
